# Supplementary material for: Osteopathy in Germany: attitudes, beliefs and handling among general practitioners – results of a nationwide cross-sectional questionnaire survey
Source: Springer Nature journal article supplement (doi:10.1186/s12875-021-01545-2), 2021-10-07
Supplement: MOESM1 [file 19737774]

(1) English translation of the questionnaire (original language: German)

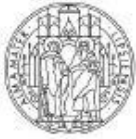

UNIVERSITÄT  
LEIPZIG

Selbständige Abteilung für Allgemeinmedizin

Fax + 49 341 97-28309

## Osteopathy in Germany: attitudes, beliefs and handling among General Practitioners

**IMPORTANT:** In order for us to include your questionnaire in our study, it is important that all questions are answered completely.  
Thank you!

### Personal details and medical practice

Age: \_\_\_\_\_ Gender:  female  male

At which university (-ies) did you study human medicine? \_\_\_\_\_

Highest academic qualification:  State examination  Diploma  Promotion  Habilitation

Acquired specialist titles (please name all of them and indicate the year of graduation)

Specialist for \_\_\_\_\_, since: \_\_\_\_\_ (year)

Specialist for \_\_\_\_\_, since: \_\_\_\_\_ (year)

Acquired additional qualifications (please name all)

\_\_\_\_\_  
\_\_\_\_\_

Type of current work:  employed, since: \_\_\_\_\_ (year)  self-employed/own practice, since: \_\_\_\_\_ (year)

Legal structure of the practice:  Single practice  Joint practice  Medical care center (MVZ)

How would you most likely describe the catchment area of the practice?  big city  small city  countryside

### Experience and handling of osteopathy

Have you ever recommended patients to be treated by an osteopath?

yes, regularly  occasionally  in a few cases  no, never

Have you ever given patients a private prescription/recommendation for osteopathic treatment?  yes  no

If yes:  at my own suggestion  at patient's request  both

If yes: For which diagnoses do you prefer to refer to an osteopath for treatment? \_\_\_\_\_

If no, why not? \_\_\_\_\_

Do you know osteopaths who work in the catchment area of your practice?  yes  no -> continue to B

If yes: has there been any cooperation with them?  yes -> continue to A  no -> continue to B

**A** Assessment on the common treatment of patients:

There was an exchange of findings.  yes  rather yes  rather not  no

The information from the osteopath was understandable.  yes  rather yes  rather not  no

The communication with the osteopath was useful for the treatment.  yes  rather yes  rather not  no

**B** Would you like to work/cooperate with osteopaths?  yes  rather yes  rather not  no

Have patients ever been sent to your practice by an osteopath?  yes  no

Do you know a qualified osteopath whom you would recommend to patients?  yes  no

Have you ever been treated by an osteopath yourself?  yes  no

What general feedback do patients give you on average after osteopathic treatment?

mainly positive  rather positive  heterogeneous  rather negative  mainly negative  no feedback

**How do you estimate the benefit of osteopathic treatment for the following patient groups?**

|                          | Very high             | Rather high           | Rather low            | Very low              |
|--------------------------|-----------------------|-----------------------|-----------------------|-----------------------|
| Newborns and infants     | <input type="radio"/> | <input type="radio"/> | <input type="radio"/> | <input type="radio"/> |
| Children and adolescents | <input type="radio"/> | <input type="radio"/> | <input type="radio"/> | <input type="radio"/> |
| Pregnant women           | <input type="radio"/> | <input type="radio"/> | <input type="radio"/> | <input type="radio"/> |
| Middle-aged adults       | <input type="radio"/> | <input type="radio"/> | <input type="radio"/> | <input type="radio"/> |
| Geriatric patients       | <input type="radio"/> | <input type="radio"/> | <input type="radio"/> | <input type="radio"/> |
| Acute patients           | <input type="radio"/> | <input type="radio"/> | <input type="radio"/> | <input type="radio"/> |
| Chronically ill patients | <input type="radio"/> | <input type="radio"/> | <input type="radio"/> | <input type="radio"/> |

**How do you estimate the benefit of osteopathic treatment for the following clinical pictures?**

|                                 | Very high             | Rather high           | Rather low            | Very low              |
|---------------------------------|-----------------------|-----------------------|-----------------------|-----------------------|
| Low back pain                   | <input type="radio"/> | <input type="radio"/> | <input type="radio"/> | <input type="radio"/> |
| Migraine/tension headache       | <input type="radio"/> | <input type="radio"/> | <input type="radio"/> | <input type="radio"/> |
| Infants' asymmetry              | <input type="radio"/> | <input type="radio"/> | <input type="radio"/> | <input type="radio"/> |
| Pain in the cervical region     | <input type="radio"/> | <input type="radio"/> | <input type="radio"/> | <input type="radio"/> |
| Vertigo, balance problems       | <input type="radio"/> | <input type="radio"/> | <input type="radio"/> | <input type="radio"/> |
| Obstructive lung diseases       | <input type="radio"/> | <input type="radio"/> | <input type="radio"/> | <input type="radio"/> |
| Temporomandibular dysfunctions  | <input type="radio"/> | <input type="radio"/> | <input type="radio"/> | <input type="radio"/> |
| Carpal tunnel syndrome          | <input type="radio"/> | <input type="radio"/> | <input type="radio"/> | <input type="radio"/> |
| Irritable bowel syndrome        | <input type="radio"/> | <input type="radio"/> | <input type="radio"/> | <input type="radio"/> |
| Gastroesophageal reflux disease | <input type="radio"/> | <input type="radio"/> | <input type="radio"/> | <input type="radio"/> |
| Arterial hypertension           | <input type="radio"/> | <input type="radio"/> | <input type="radio"/> | <input type="radio"/> |
| Psychiatric disorders           | <input type="radio"/> | <input type="radio"/> | <input type="radio"/> | <input type="radio"/> |
| Parkinson's disease             | <input type="radio"/> | <input type="radio"/> | <input type="radio"/> | <input type="radio"/> |
| Otitis media in children        | <input type="radio"/> | <input type="radio"/> | <input type="radio"/> | <input type="radio"/> |
| Excessive crying in infancy     | <input type="radio"/> | <input type="radio"/> | <input type="radio"/> | <input type="radio"/> |

Where do you get information about osteopathy? (multiple answers possible)

- Medical journals                       Non-medical journals                       personal stories  
 Television     Internet     Other: \_\_\_\_\_                       have hardly/no information on the subject

How would you rate your knowledge of the concepts of osteopathy and its treatment techniques?

- very good knowledge                       good knowledge                       little knowledge                       no knowledge

Did you know that osteopathy in Germany may only be practiced by doctors and alternative practitioners?

- yes     no

**How do you agree with the following statements?**

|                                                                                                                                  | Totally agree         | Rather agree          | Rather disagree       | Don't agree at all    |
|----------------------------------------------------------------------------------------------------------------------------------|-----------------------|-----------------------|-----------------------|-----------------------|
| There is no evidence for the effectiveness of osteopathy.                                                                        | <input type="radio"/> | <input type="radio"/> | <input type="radio"/> | <input type="radio"/> |
| The range of indications for osteopathy should be clearly limited.                                                               | <input type="radio"/> | <input type="radio"/> | <input type="radio"/> | <input type="radio"/> |
| For general practitioners a detailed knowledge of osteopathy is useful.                                                          | <input type="radio"/> | <input type="radio"/> | <input type="radio"/> | <input type="radio"/> |
| I consider the partial coverage of costs for osteopathic treatments by the statutory health insurance companies to be justified. | <input type="radio"/> | <input type="radio"/> | <input type="radio"/> | <input type="radio"/> |
| The occupation "osteopath" should be established as an independent health profession in Germany.                                 | <input type="radio"/> | <input type="radio"/> | <input type="radio"/> | <input type="radio"/> |

**Comments**

Thank you for your cooperation!
