# Supplementary material for: Osteopathy in Germany: attitudes, beliefs and handling among general practitioners – results of a nationwide cross-sectional questionnaire survey
Source: Springer Nature journal article supplement (doi:10.1186/s12875-021-01545-2), 2021-10-07
Supplement: MOESM2 [file 19737774]

## (2) Cross table with univariate predictors of recommendations (all items matched, ntotal=341)

| Have you ever recommended patients to be treated by an osteopath? (dichotomized)                          |        |                                              |                        | in a few cases;<br>no, never       | yes, regularly;<br>occasionally    |                               |                                  |
|-----------------------------------------------------------------------------------------------------------|--------|----------------------------------------------|------------------------|------------------------------------|------------------------------------|-------------------------------|----------------------------------|
| Parameters                                                                                                | nvalid | Categories                                   | ntotal<br>(relative %) | absolute<br>number<br>(relative %) | absolute<br>number<br>(relative %) | p (Pearson<br>Chi-<br>Square) | Exp(B)/Odds<br>Ratio<br>(95% CI) |
| Gender                                                                                                    | 341    | male                                         | 184 (54.0)             | 69 (37.5)                          | 115 (62.5)                         | <b>0.002</b>                  | <b>2.09 (1.29-3.38)</b>          |
|                                                                                                           |        | female                                       | 157 (46.0)             | 35 (22.3)                          | 122 (77.7)                         |                               |                                  |
| Scientific qualification<br>(PhD or habilitation?)                                                        | 316    | no                                           | 113 (35.4)             | 29 (25.7)                          | 84 (74.3)                          | 0.174                         | 0.70 (0.42-1.17)                 |
|                                                                                                           |        | yes                                          | 203 (63.6)             | 67 (33.0)                          | 136 (67.0)                         |                               |                                  |
| Age category                                                                                              | 338    | ≤ 39 years                                   | 23 (6.7)               | 7 (30.4)                           | 16 (69.6)                          | 0.997                         | 1.00 (0.40-2.51)                 |
|                                                                                                           |        | 40-49 years                                  | 70 (20.3)              | 22 (31.4)                          | 48 (68.6)                          |                               |                                  |
|                                                                                                           |        | 50-59 years                                  | 134 (39.6)             | 32 (23.9)                          | 102 (76.1)                         |                               |                                  |
|                                                                                                           |        | ≥ 60 years                                   | 111 (32.8)             | 42 (37.8)                          | 69 (62.2)                          |                               |                                  |
| In which year becoming<br>medical specialist?                                                             | 321    | before 1980                                  | 9 (2.8)                | 6 (66.7)                           | 3 (33.3)                           | 0.290                         | 1.39 (0.76-2.56)                 |
|                                                                                                           |        | 1980-1989                                    | 57 (17.8)              | 20 (35.1)                          | 37 (64.9)                          |                               |                                  |
|                                                                                                           |        | 1990-1999                                    | 103 (32.1)             | 31 (30.1)                          | 72 (69.9)                          |                               |                                  |
|                                                                                                           |        | 2000-2009                                    | 86 (26.8)              | 26 (30.2)                          | 60 (69.8)                          |                               |                                  |
|                                                                                                           |        | 2010-2019                                    | 66 (20.6)              | 17 (25.8)                          | 49 (74.2)                          |                               |                                  |
| When established<br>practice and started to<br>work there?                                                | 285    | before 1980                                  | 7 (2.5)                | 5 (71.4)                           | 2 (28.6)                           | 0.301                         | 1.31 (0.78-2.20)                 |
|                                                                                                           |        | 1980-1989                                    | 38 (13.3)              | 16 (42.1)                          | 22 (57.9)                          |                               |                                  |
|                                                                                                           |        | 1990-1999                                    | 102 (35.8)             | 31 (30.4)                          | 71 (69.6)                          |                               |                                  |
|                                                                                                           |        | 2000-2009                                    | 77 (27.6)              | 22 (28.6)                          | 55 (71.4)                          |                               |                                  |
|                                                                                                           |        | 2010-2019                                    | 61 (21.4)              | 17 (27.9)                          | 44 (72.1)                          |                               |                                  |
| Completed at least one<br>additional qualification                                                        | 341    | no                                           | 230 (67.5)             | 70 (30.4)                          | 160 (69.6)                         | 0.971                         | 0.99 (0.61-1.62)                 |
|                                                                                                           |        | yes                                          | 111 (32.5)             | 34 (30.6)                          | 77 (69.4)                          |                               |                                  |
| Practice environment                                                                                      | 327    | big city                                     | 72 (22.0)              | 21 (29.2)                          | 51 (70.8)                          | 0.630                         | 1.15 (0.65-2.04)                 |
|                                                                                                           |        | small city                                   | 122 (37.3)             | 38 (31.1)                          | 84 (68.9)                          |                               |                                  |
|                                                                                                           |        | countryside                                  | 133 (40.7)             | 44 (33.1)                          | 89 (66.9)                          |                               |                                  |
| Legal structure of<br>practice                                                                            | 267    | Single practice                              | 157 (58.8)             | 48 (30.6)                          | 109 (69.4)                         | 0.494                         | 1.20 (0.71-2.01)                 |
|                                                                                                           |        | Joint practice                               | 101 (37.8)             | 37 (36.6)                          | 64 (63.4)                          |                               |                                  |
|                                                                                                           |        | Medical care<br>center                       | 9 (3.4)                | 1 (11.1)                           | 8 (88.9)                           |                               |                                  |
| Place of practice                                                                                         | 340    | States of former<br>West Germany             | 256 (75.3)             | 86 (33.6)                          | 170 (66.4)                         | <b>0.021</b>                  | <b>1.99 (1.10-3.60)</b>          |
|                                                                                                           |        | States of former<br>East Germany<br>+ Berlin | 84 (24.7)              | 17 (20.2)                          | 67 (79.8)                          |                               |                                  |
| Do you know any<br>osteopaths who work in<br>the catchment area of<br>your practice?                      | 337    | no                                           | 76 (22.6)              | 42 (55.3)                          | 34 (44.7)                          | <b>&lt;0.001</b>              | <b>4.11 (2.43-6.96)</b>          |
|                                                                                                           |        | yes                                          | 261 (77.4)             | 59 (22.6)                          | 202 (77.4)                         |                               |                                  |
| Do you know a qualified<br>osteopath whom you<br>would recommend to<br>patients?                          | 328    | no                                           | 112 (34.1)             | 66 (58.9)                          | 46 (41.1)                          | <b>&lt;0.001</b>              | <b>6.94 (4.14-11.64)</b>         |
|                                                                                                           |        | yes                                          | 216 (65.9)             | 37                                 | 179                                |                               |                                  |
| General feedback of<br>patients regarding their<br>osteopathic treatment                                  | 333    | rather/mainly<br>positive                    | 229 (68.8)             | 40 (17.5)                          | 189 (82.5)                         | <b>&lt;0.001</b>              | <b>7.26 (4.31-12.22)</b>         |
|                                                                                                           |        | heterogeneous                                | 76 (22.8)              | 42 (55.3)                          | 34 (44.7)                          |                               |                                  |
|                                                                                                           |        | rather/mainly<br>negative                    | 9 (2.7)                | 7 (77.8)                           | 2 (22.2)                           |                               |                                  |
|                                                                                                           |        | no feedback                                  | 19 (5.7)               | 14 (73.7)                          | 5 (26.3)                           |                               |                                  |
| Have you ever been<br>treated by an osteopath<br>yourself?                                                | 333    | no                                           | 222 (66.7)             | 90 (40.5)                          | 132 (59.5)                         | <b>&lt;0.001</b>              | <b>5.14 (2.72-9.72)</b>          |
|                                                                                                           |        | yes                                          | 111 (33.3)             | 13 (11.7)                          | 98 (88.3)                          |                               |                                  |
| How would you rate your<br>knowledge of the<br>concepts of osteopathy<br>and its treatment<br>techniques? | 338    | no/little<br>expertise                       | 195 (57.7)             | 71 (36.4)                          | 124 (63.6)                         | <b>0.009</b>                  | <b>1.91 (1.17-3.14)</b>          |
|                                                                                                           |        | good/very good<br>expertise                  | 143 (42.3)             | 33 (23.1)                          | 110 (76.9)                         |                               |                                  |
